# Supplementary material
Source: PubMed Central journal article supplement (PMC10063668)
Supplement: 41467_2023_37368_MOESM1_ESM.pdf [file 41467_2023_37368_MOESM1_ESM.pdf]

## **Supplementary Information**

**Post-acute Sequelae of COVID-19 is Characterized by diminished peripheral CD8<sup>+</sup>β7 Integrin<sup>+</sup> T cells and Anti-SARS-CoV-2 IgA response**

**Santa Cruz et al.**

## Supplementary Figure 1

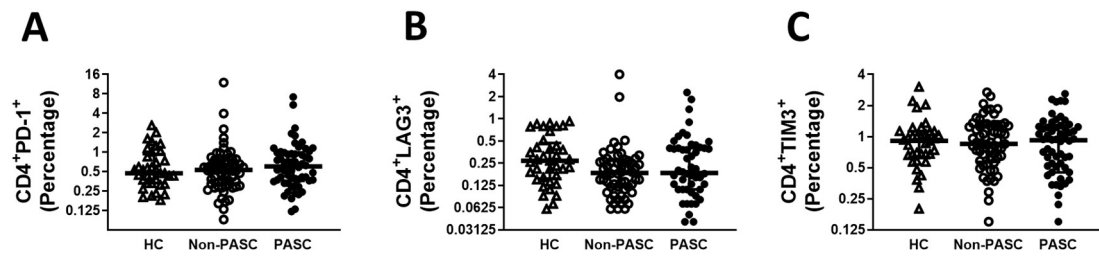

**Supplementary Figure 1. CD4<sup>+</sup> T cell immune activation during SARS-CoV-2 infection on convalescents that developed PASC condition.** (A) Percentages of the CD4<sup>+</sup> T lymphocytes expressing PD-1 (A), LAG3 (B) and TIM3 (C) of HC (n = 37), non-PASC (n = 65) and PASC (n = 62) individuals. Data are shown in a scatter dot plot format as median  $\pm$  IQR

## Supplementary Figure 2

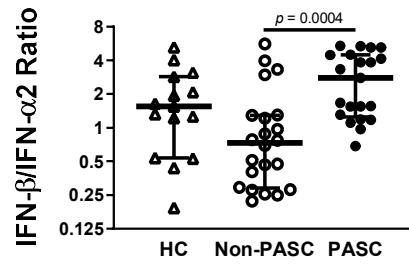

**Supplementary Figure 2. CD4<sup>+</sup> T cell immune activation during SARS-CoV-2 infection on convalescents that developed PASC condition.** (A) Percentages of the CD4<sup>+</sup> T lymphocytes expressing PD-1 (A), LAG3 (B) and TIM3 (C) of HC (n = 37), non-PASC (n = 65) and PASC (n = 62) individuals. Data are shown in a scatter dot plot format as median ± IQR

### Supplementary Figure 3

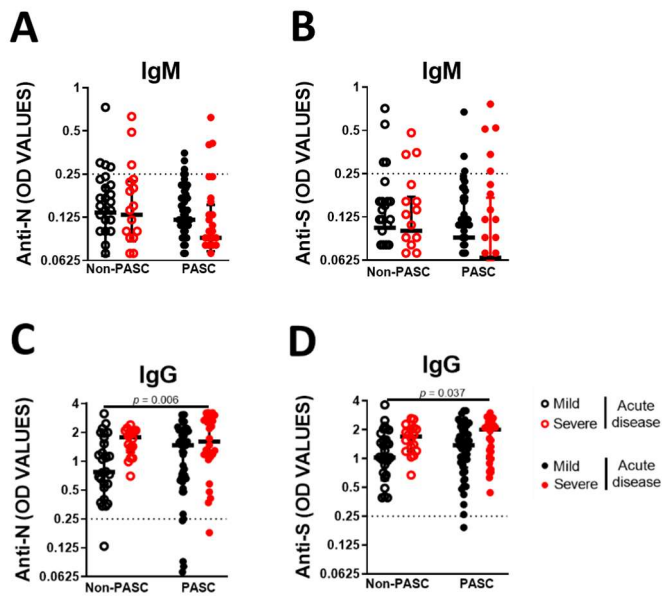

**Supplementary Figure 3. Anti-N and anti-S humoral response.** Quantification of the anti-N (A) and anti-S (B) IgM responses and anti-N (C) and anti-S (D) IgG in convalescent patients according to acute disease severity. Non-PASC individuals with mild ( $n = 30$ ) or severe disease ( $n = 18$ ) and PASC patients with mild ( $n = 50$ ) and severe disease ( $n = 28$ ) were tested. Data are shown in a scatter dot plot format as median  $\pm$  IQR;

## Supplementary Figure 4

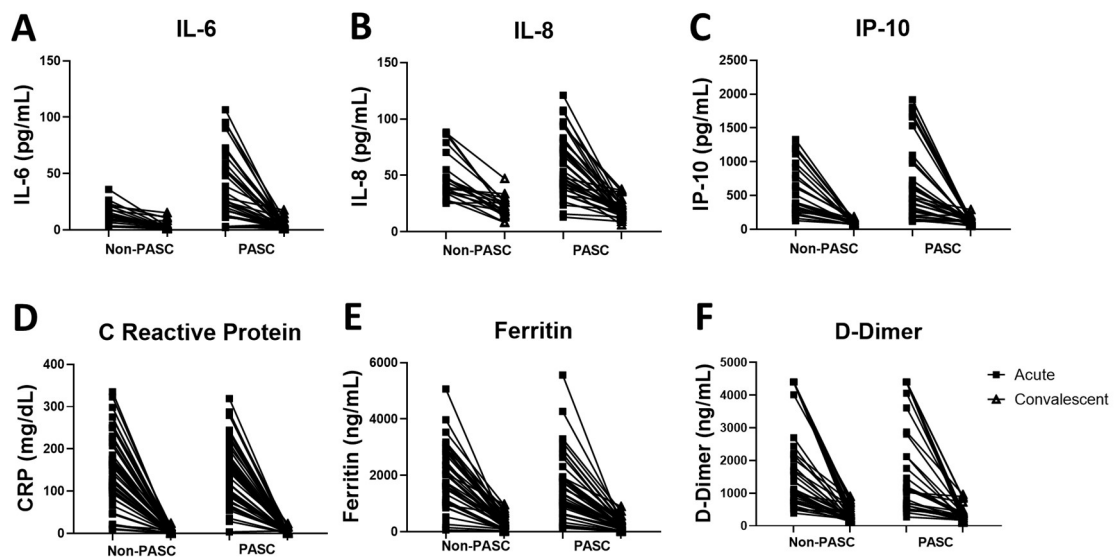

**Supplementary Figure 4. Comparison of cytokine levels between acute disease and convalescence.** The levels of IL-6 (A), IL-8 (B), IP-10 (C), CRP (D), ferritin (E), and d-dimer (F) were quantified on the plasma of acutely infected SARS-CoV2 (Acute) and at convalescence in individuals that develop (PASC) or do not develop (Non-PASC) post COVID-19 condition (Convalescent). For figures 6A-C, we tested non-PASC individuals during acute disease (n = 27) or convalescence (n = 29) and PASC patients during acute disease (n = 28) or convalescence (n = 30). For figures 6D-F, we tested non-PASC individuals during acute disease (n = 43) or convalescence (n = 41) and PASC patients during acute disease (n = 39) or convalescence (n = 36). Data are shown in a scatter dot plot format.

## Supplementary Figure 5

### Immunological profile of Post-Acute Sequelae SARS-CoV-2 Condition

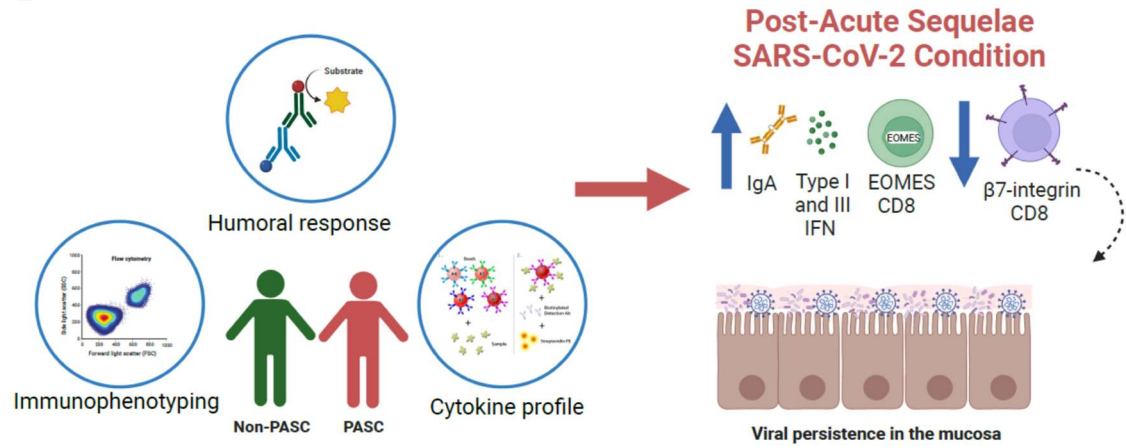

Supplementary Figure 5. Immunological profile of Post-Acute Sequelae of SARS-CoV-2 Condition (Created with BioRender.com)

## Supplementary Figure 6

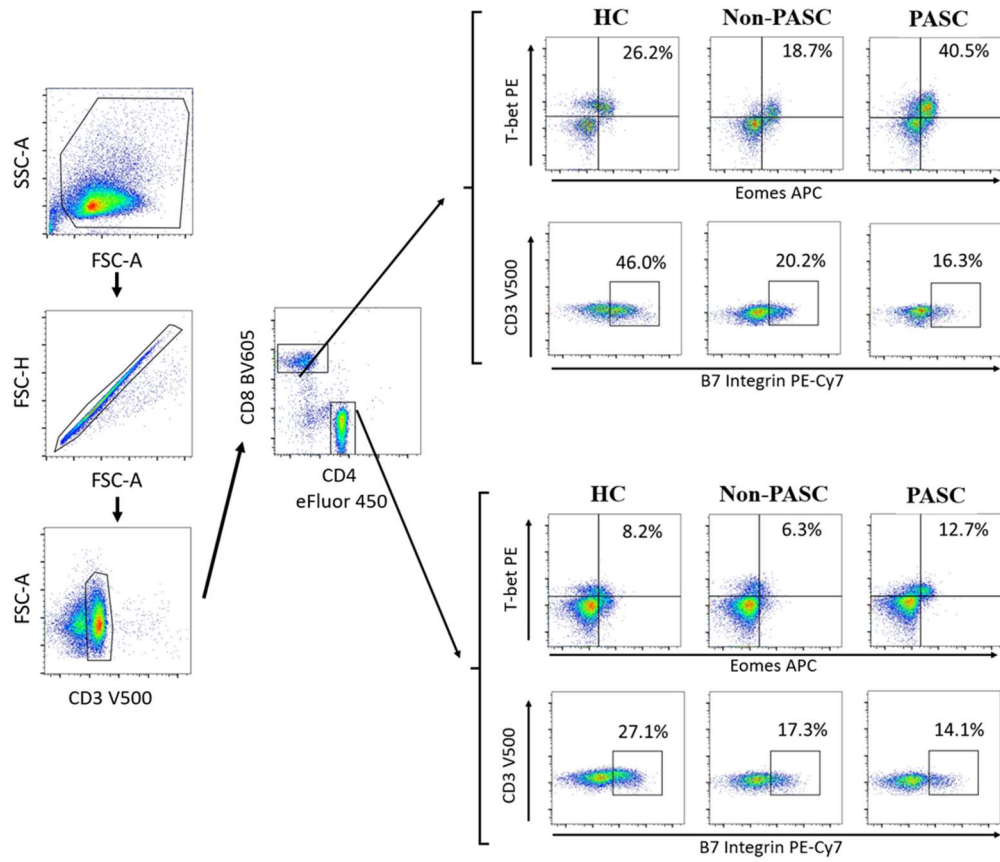

**Supplementary Figure 6. Gating strategy.** Gating strategy for Eomes<sup>+</sup> T-bet<sup>+</sup> CD4<sup>+</sup> and CD8<sup>+</sup> T lymphocytes as well as  $\beta$ 7integrin<sup>+</sup> CD4<sup>+</sup> and CD8<sup>+</sup> T lymphocytes.

## Supplementary Figure 7

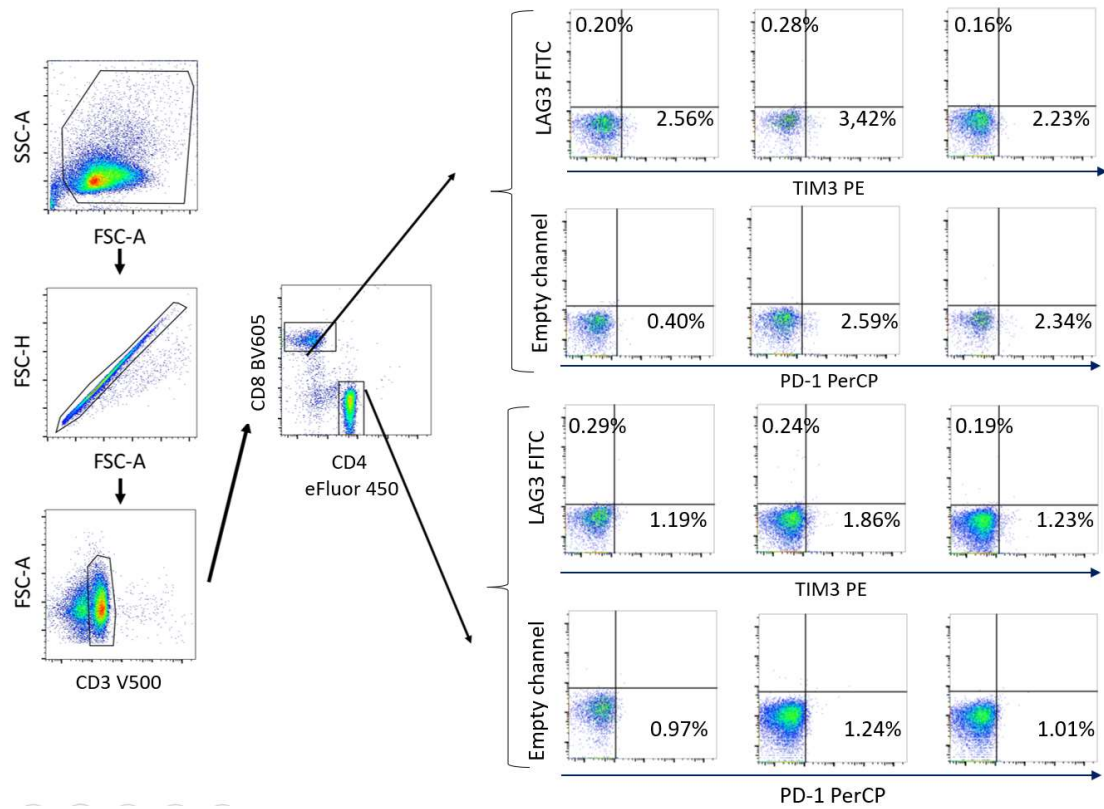

**Supplementary Figure 7. Gating strategy.** Gating strategy and representative histograms for PD-1<sup>+</sup>, Lag-3<sup>+</sup> and TIM-3<sup>+</sup> CD4<sup>+</sup> and CD8<sup>+</sup> T lymphocytes.



## Supplementary Figure 8

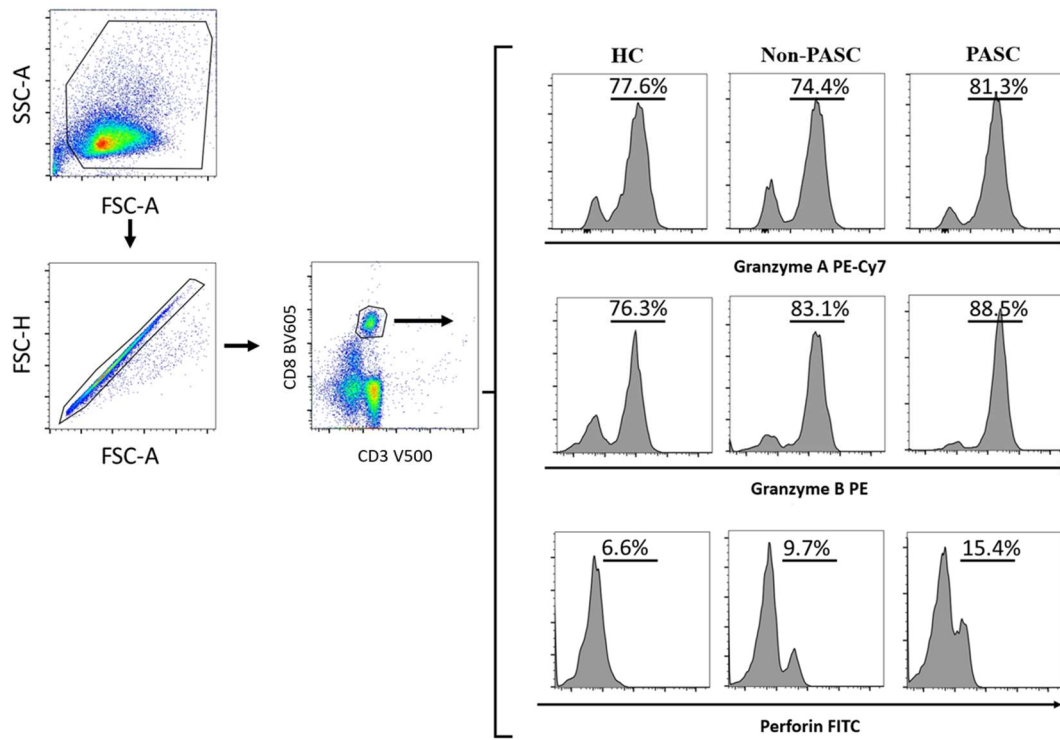

**Supplementary Figure 8. Gating strategy.** Gating strategy and representative histograms for the expression of granzyme A, granzyme B and Perforin on CD8<sup>+</sup> T lymphocytes.

**Supplementary Table 1. Laboratory parameters evaluated during appointment six months after infection.**

| Parameter                                    | Non-PASC<br>(n=65)      | PASC<br>(n=62)          | Mann-Whitney |         |
|----------------------------------------------|-------------------------|-------------------------|--------------|---------|
|                                              |                         |                         | r            | p-value |
| <b>Laboratory parameters, median (range)</b> |                         |                         |              |         |
| Lymphocyte count (lymphocyte/ $\mu$ L)       | 2100<br>(1300-4500)     | 2400<br>(1000-3600)     | 0.021        | 0.827   |
| C-reactive Protein (mg/dL)                   | 1.5<br>(0.5-23.7)       | 1.1<br>(0.5-96.8)       | 0.042        | 0.676   |
| Ferritin (ng/mL)                             | 261.0<br>(8.0-974.0)    | 181.0<br>(7.0-893.0)    | 0.140        | 0.166   |
| D-dimers (ng/mL)                             | 320.0<br>(127.0-1458.0) | 360.0<br>(100.0-2183.0) | 0.032        | 0.756   |

**Supplementary Table 2: Comparison of inflammatory markers between acute and convalescent samples.**

| <b>Variable</b> | <b>Df</b> | <b>F</b> | <b><i>p</i>-value</b> | <b>Partial Eta Squared</b> |
|-----------------|-----------|----------|-----------------------|----------------------------|
| <b>IL-6</b>     | 1, 69     | 0.009    | 0.92                  | 0.001                      |
| <b>IL-8</b>     | 1, 70     | 0.742    | 0.39                  | 0.010                      |
| <b>IP-10</b>    | 1, 70     | 0.634    | 0.43                  | 0.009                      |
| <b>CRP</b>      | 1, 89     | 0.527    | 0.47                  | 0.006                      |
| <b>Ferritin</b> | 1, 81     | 0.319    | 0.57                  | 0.004                      |
| <b>D-Dimers</b> | 1, 82     | 0.080    | 0.78                  | 0.001                      |

A mixed-design ANOVA including PASC and non-PASC as between-subject factor and the pre-post measures as within-subject factors for all parameters to test the interaction between these two factors.

**Supplementary Table 3: Antibody information.**

| <b>Marker</b>                                  | <b>Conjugated</b> | <b>Clone</b> | <b>Cat#</b> | <b>Manufacturer</b> | <b>Amount for 100µL</b> |
|------------------------------------------------|-------------------|--------------|-------------|---------------------|-------------------------|
| CD3                                            | V500              | SP34-2       | 560770      | BD Biosciences      | 1.25                    |
| CD4                                            | eFluor 450        | OKT-4        | 48-0048-42  | Invitrogen          | 1.25                    |
| CD8                                            | BV605             | SK1          | 344742      | Biologend           | 1.00                    |
| β7 integrin                                    | PE-Cy7            | FIB504       | 25-5867-42  | Invitrogen          | 1.25                    |
| PD-1                                           | PerCP             | EH12.2H7     | 329938      | Biologend           | 1.25                    |
| LAG3                                           | FITC              | P18627       | FAB2319F    | R&D                 | 2.50                    |
| TIM3                                           | PE                | 344823       | FAB2365P    | R&D                 | 1.25                    |
| Granzyme A                                     | PE-Cy7            | CB9          | 25-9177-42  | Invitrogen          | 0.63                    |
| Tbet                                           | PE                | eBio4B10     | 12-5825-82  | Invitrogen          | 1.25                    |
| Eomes                                          | eFluor 660        | WD1928       | 50-4877-42  | Invitrogen          | 1.25                    |
| Granzyme B                                     | PE                | GB-11        | M2289       | Sanquin             | 0.63                    |
| Perforin                                       | FITC              | Pf-344       | 3465-7      | MabTech             | 0.63                    |
| CD69                                           | FITC              | FN50         | 310904      | Biologend           | 4.00                    |
| Goat anti-Human IgG (Fc specific) <sup>1</sup> | Peroxidase        | A0170        | A0170       | Millipore           | 0.02                    |
| Goat anti-Human IgM (Fc specific) <sup>1</sup> | Peroxidase        | 401905       | 401905      | Millipore           | 0.02                    |
| Goat anti-Human IgA (Fc specific) <sup>1</sup> | Peroxidase        | SAB3701229   | SAB3701229  | Millipore           | 0.02                    |

### **Supplementary references:**

<sup>1</sup> André S, Azarias da Silva M, Picard M, Alleaume-Buteau A, Kundura L, Cezar R, Soudaramourty C, André SC, Mendes-Frias A, Carvalho A, Capela C, Pedrosa J, Gil Castro A, Loubet P, Sotto A, Muller L, Lefrant JY, Roger C, Claret PG, Duvnjak S, Tran TA, Zghidi-Abouzid O, Nioche P, Silvestre R, Corbeau P, Mammano F, Estaquier J. Low quantity and quality of anti-spike humoral response is linked to CD4 T-cell apoptosis in COVID-19 patients. *Cell Death Dis.* 2022 Aug 27;13(8):741.
